# Supplementary material for: Adjuvant-induced macrophage activation compromises BA71ΔCD2-mediated protection against African swine fever virus
Source: Research Square preprint supplement (doi:10.21203/rs.3.rs-7815447/v1), 2025-11-06
Supplement: Supplementary file 1 [file 57c8ebafb2327554a1f249e0.docx]

**
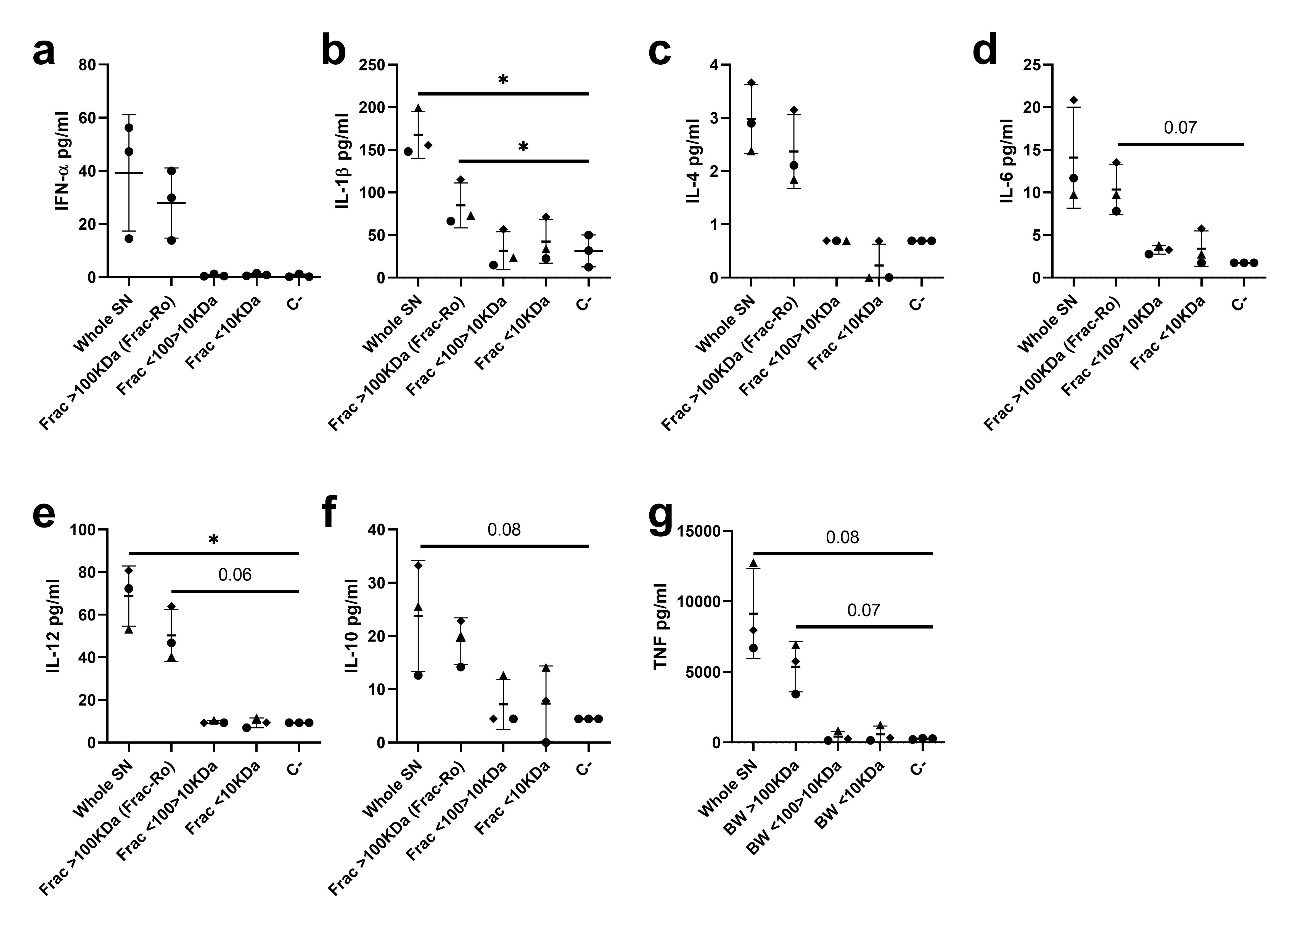
**

**Supplementary Figure 1.** PAMs were stimulated for 24 hours with the different supernatant fractions separated by molecular weights. Levels of IFN- (**a**), IL-1 (**b**), IL-4 (**c**), IL-6 (**d**), IL-12 (**e**), IL-10 (**f**), and TNF (**g**) from PAMs supernatant were measured by Luminex-based multiplex assay. Non-stimulated cells were used as control. Significant differences were determined using a one-way ANOVA (* p-value ≤ 0.05).


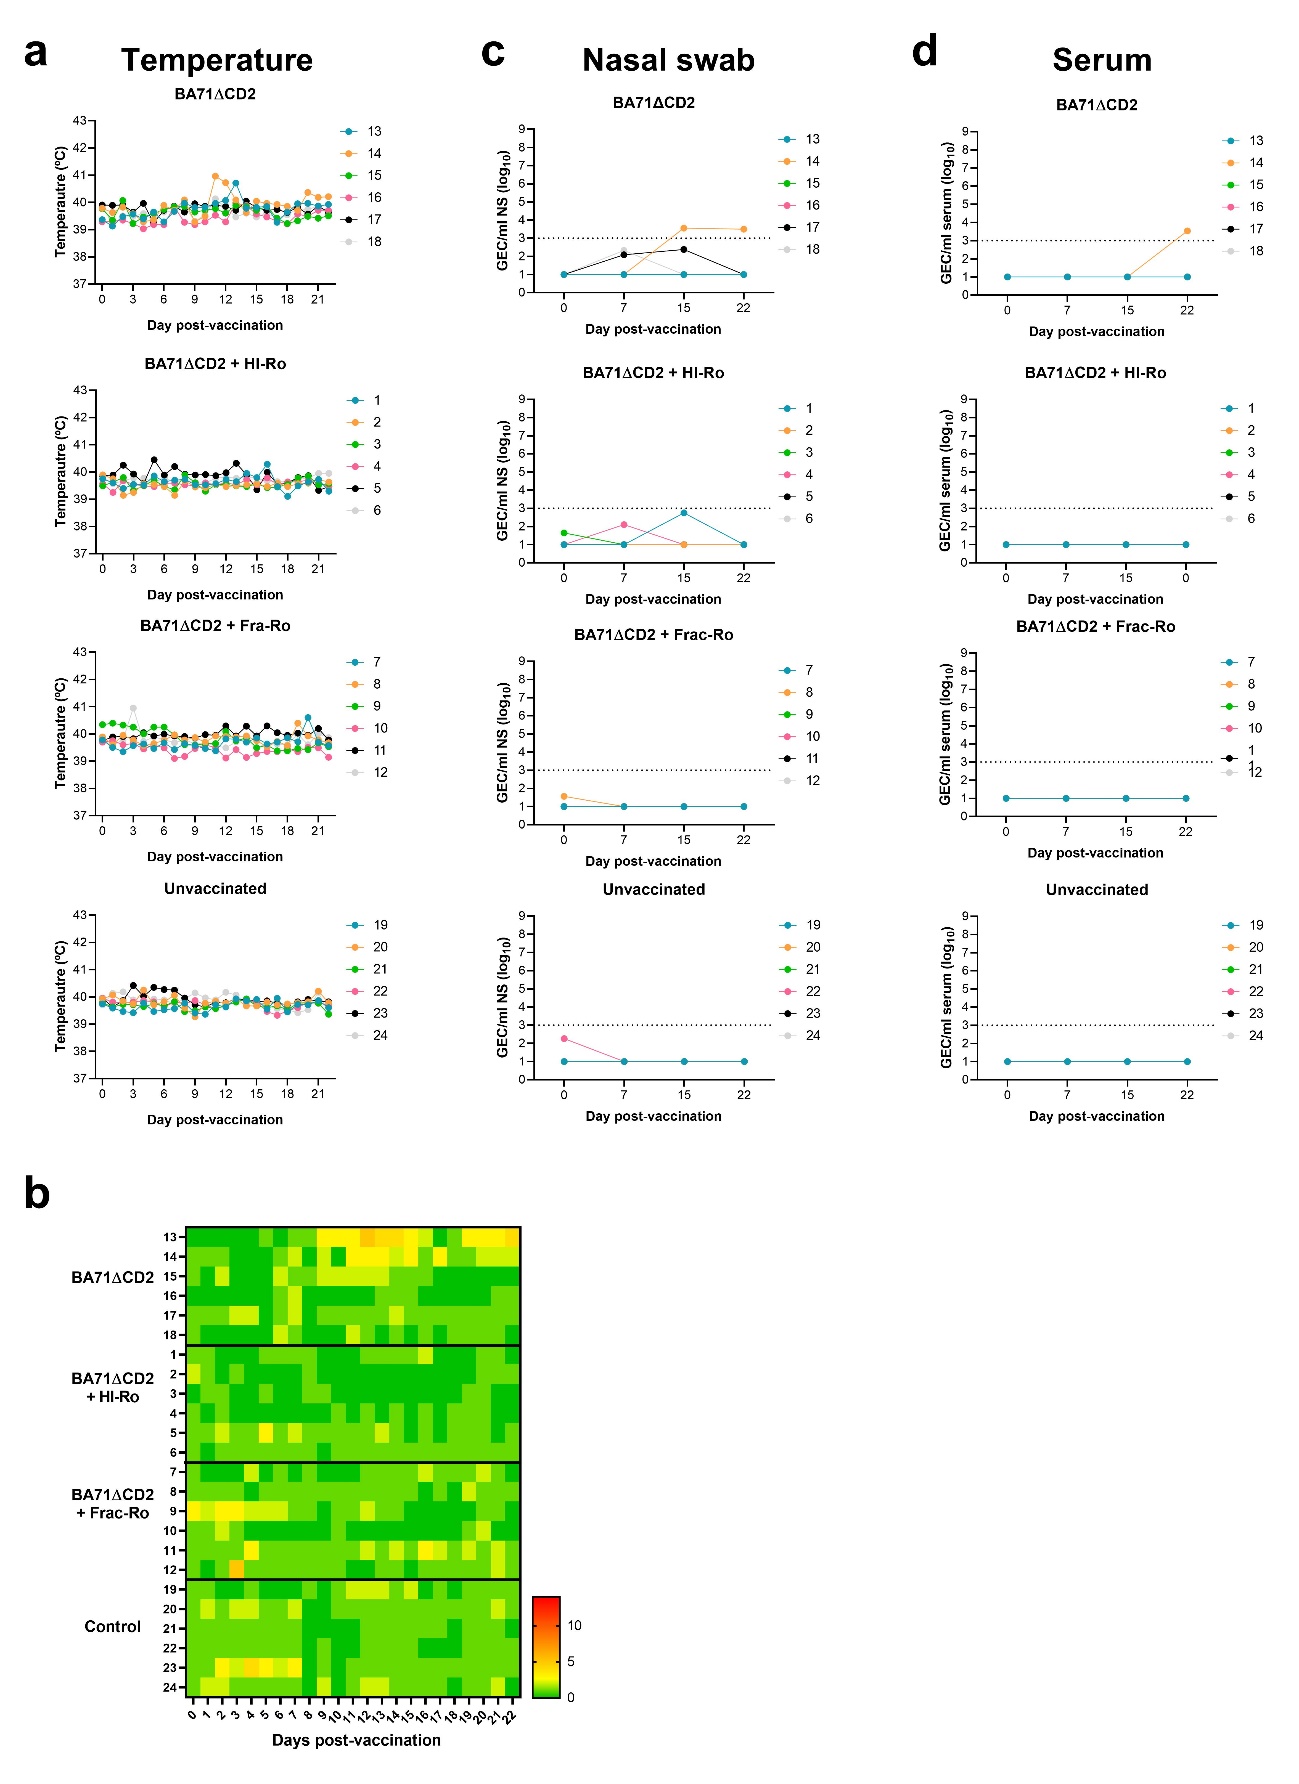


**Supplementary Figure 2.** Daily rectal temperature charts (**a**) and clinical scores (**b**) of individual pigs from day 0 to day 22 post-vaccination (p.v.). The severity of the clinical signs (score value) is represented by a coloured gradient: green (absence), yellow (mild), and orange/red (severe). (**c-d**) Virus loads measured by qPCR in nasal swabs (**c**) and serum (**d**) at days 0, 7, 15, and 22 p.v. Genomic equivalent copies (GEC) of ASFV were quantified by the detection of the ASFV gene *PK*.

**
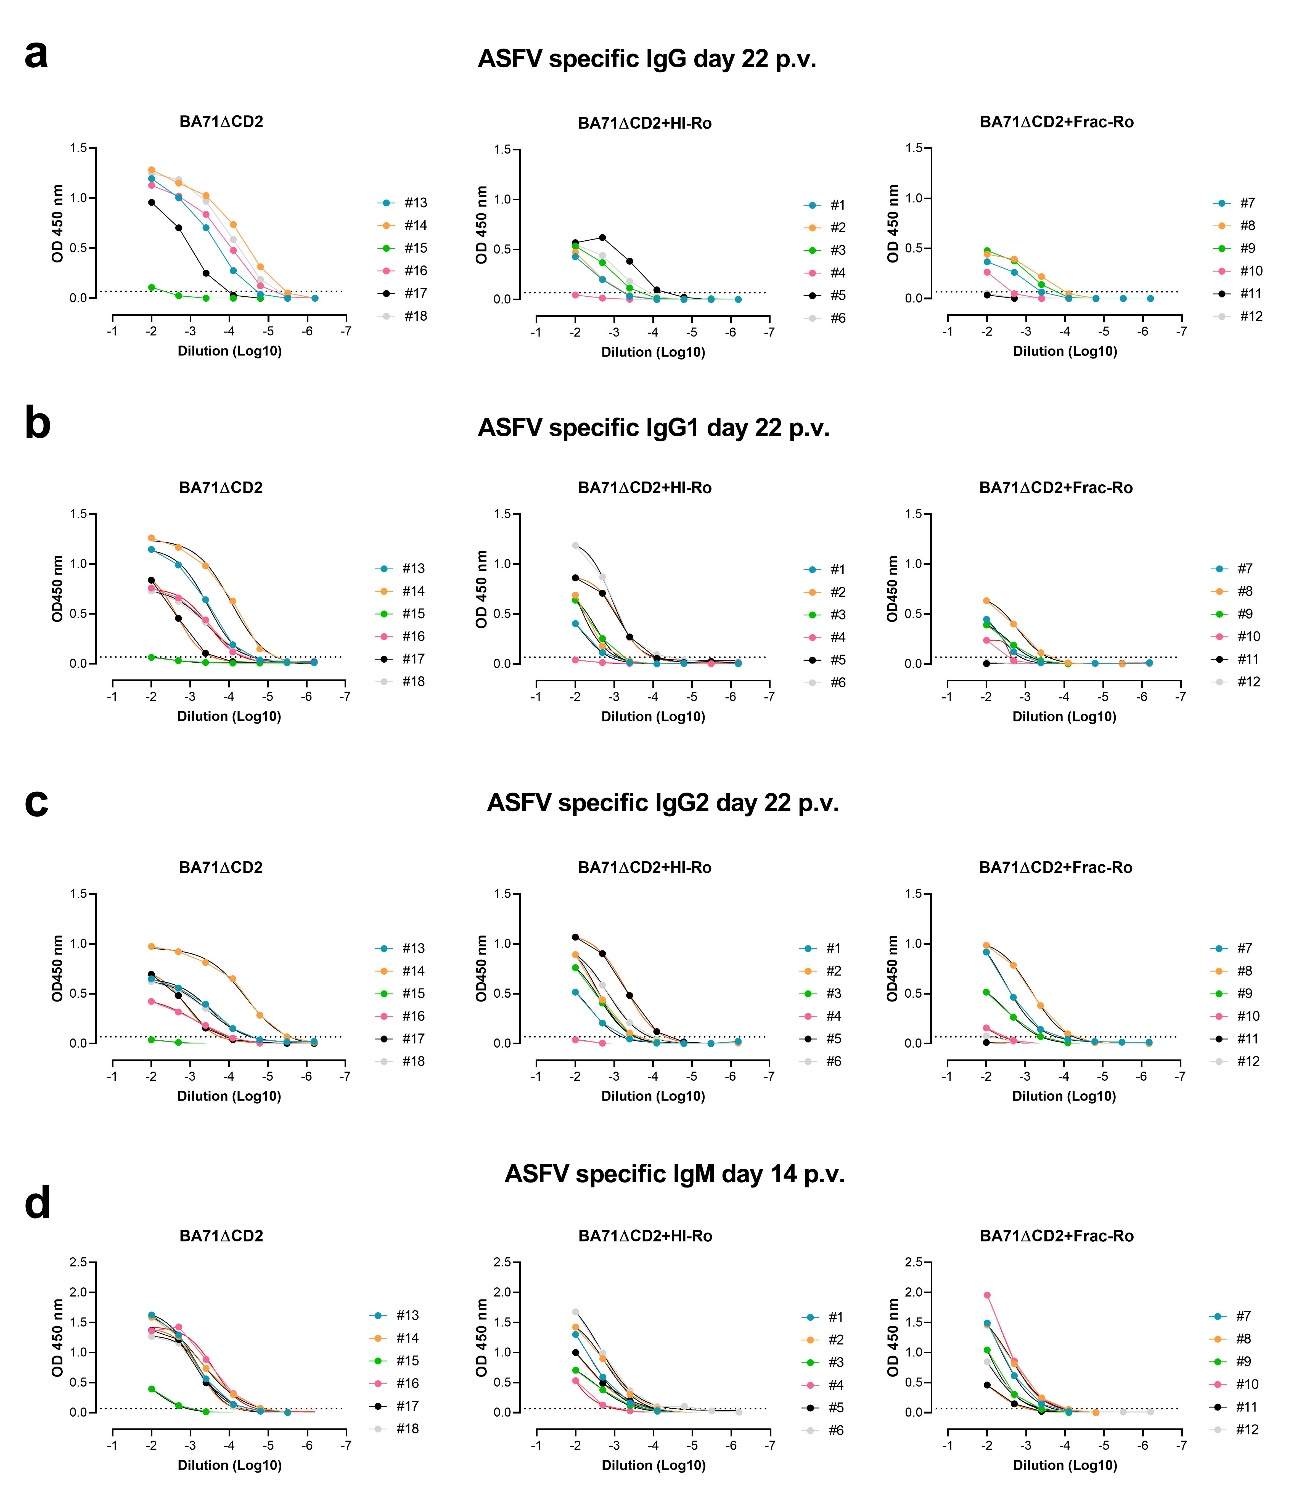
**

**Supplementary Figure 3.** ASFV-specific IgG (**a**), IgG1 (**b**), IgG2 (**c**), and IgM (**d**) antibodies measured by ELISA at 22 (**a-c**) or 14 (**d**) days p.v. for each animal.


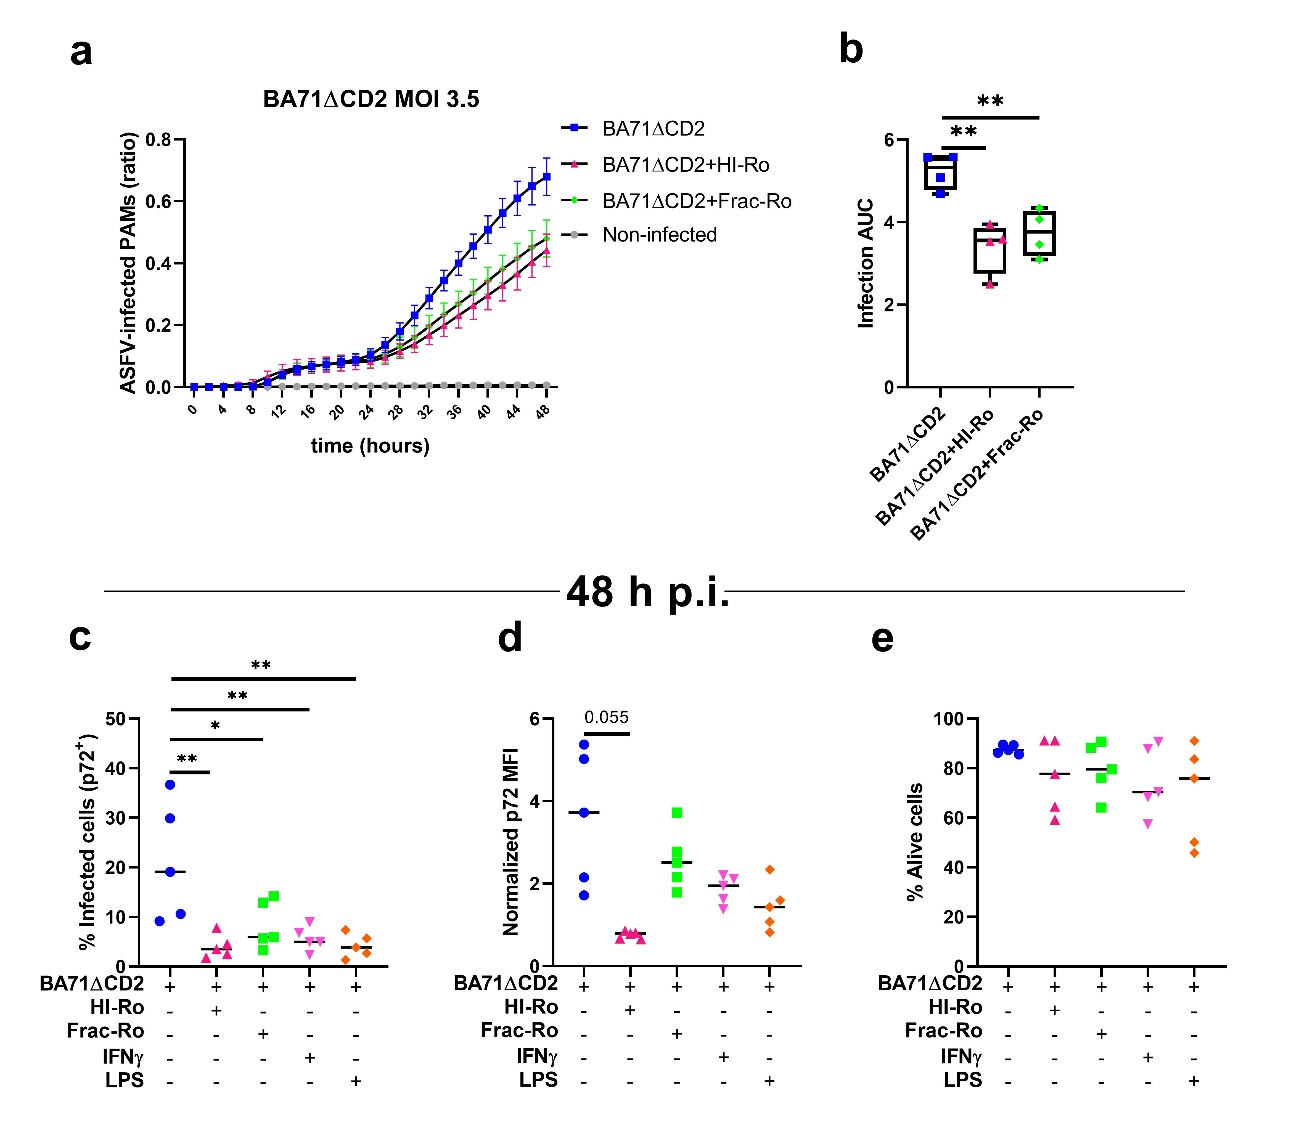


**Supplementary Figure 4.** (**a-b**)PAMs were infected with the fluorescently-labelled BA71ΔCD2-mWasabi at MOI 3.5. Two hours post-infection, cells were treated with HI-Ro (MOI 50), Frac-Ro or left untreated. (**a**) The percentages of p72-positive infected cells were analyzed every 2 hours using time-lapse Incucyte analysis. (**b**) Area under the curve (AUC) for each condition obtained from the kinetics of percentages of infected cells. (**c-e**) BA71ΔCD2-infected PAMs (MOI 3.5) treated with HI-Ro (MOI 50), Frac-Ro, IFN- (0.1 g/mL), LPS (10 g/mL) or left untreated were analyzed at 48 hours post-infection by flow cytometry. The percentages of BA71ΔCD2-infected cells (**c**), the mean fluorescence intensity (MFI) of the p72 ASFV protein (**d**), and the percentage of alive cells (**e**) are shown. Non-infected cells were used as control. Significant differences were determined using a one-way ANOVA (* p-values ≤ 0.05, ** ≤ 0.01, *** ≤ 0.001).

**
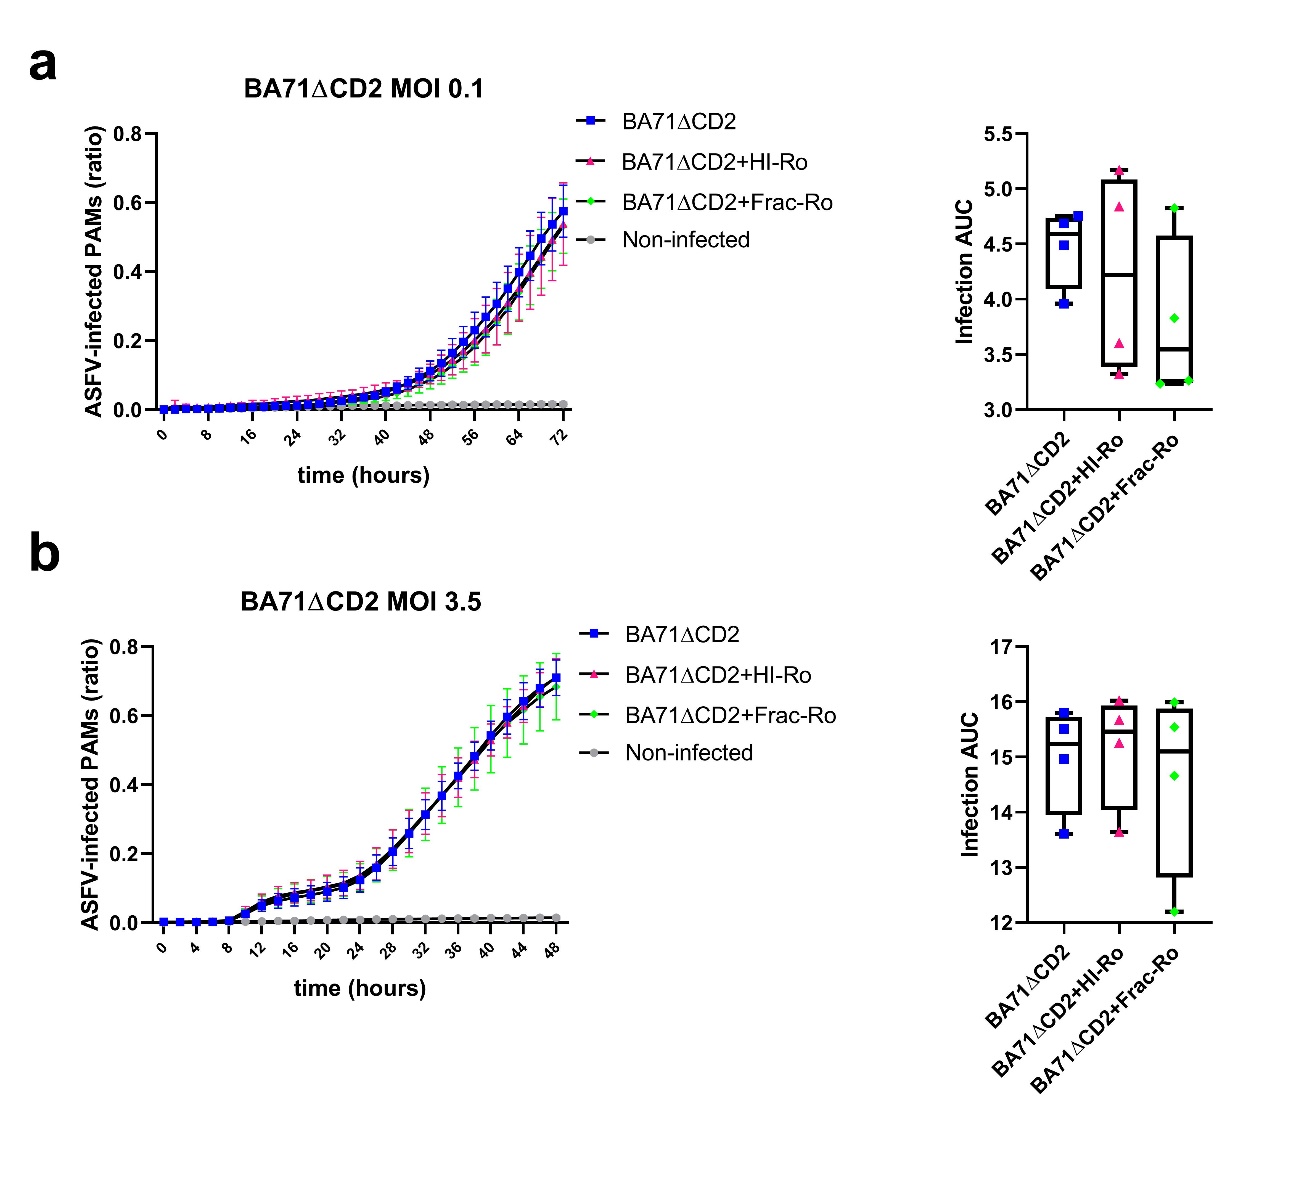
**

**Supplementary Figure 5. Short HI-Ro or Frac-Ro stimulation do not impair BA71**Δ**CD2 replication**. PAMs were stimulated with HI-Ro (MOI 50), Frac-Ro or left untreated for 2 hours (**a-b**). Subsequently, cells were infected with the fluorescent-labelled BA71ΔCD2-mWasabi at MOI 0.1 (**a**) or 3.5 (**b**). The percentages of ASFV-infected cells quantified every 2 hours using time-lapse Incucyte analysis, and the area under the curve (AUC) of the virus kinetics expansion was calculated.
