# Supplementary material for: Adjuvant-induced macrophage activation compromises BA71ΔCD2-mediated protection against African swine fever virus
Source: Research Square preprint supplement (doi:10.21203/rs.3.rs-7815447/v1), 2025-11-06
Supplement: Supplementary file 2 [file 9c9df40ae2724da85d181258.xlsx]

## Sheet: Hoja1
Supplementary Data 1. Statistical analysis results from microfluidic quantitative PCR assay data.
Gene	group1	group2	n1	n2	p	p.signif
BCL2	BA71dCD2	Uninfected	5	5	0.497	ns
BCL2	BA71dCD2_Frac-Ro	Uninfected	5	5	0.0673	ns
BCL2	BA71dCD2_HI-Ro	Uninfected	5	5	0.000835	***
CASP8	BA71dCD2	Uninfected	5	5	0.678	ns
CASP8	BA71dCD2_Frac-Ro	Uninfected	5	5	0.923	ns
CASP8	BA71dCD2_HI-Ro	Uninfected	5	5	0.0373	*
CCL2	BA71dCD2	Uninfected	5	5	0.897	ns
CCL2	BA71dCD2_Frac-Ro	Uninfected	5	5	0.0358	*
CCL2	BA71dCD2_HI-Ro	Uninfected	5	5	0.141	ns
CCL3	BA71dCD2	Uninfected	5	5	0.893	ns
CCL3	BA71dCD2_Frac-Ro	Uninfected	5	5	0.00157	**
CCL3	BA71dCD2_HI-Ro	Uninfected	5	5	0.000159	***
CCL4	BA71dCD2	Uninfected	5	5	0.791	ns
CCL4	BA71dCD2_Frac-Ro	Uninfected	5	5	0.000497	***
CCL4	BA71dCD2_HI-Ro	Uninfected	5	5	8.53e-05	****
CCL5 (RANTES)	BA71dCD2	Uninfected	5	5	0.766	ns
CCL5 (RANTES)	BA71dCD2_Frac-Ro	Uninfected	5	5	0.458	ns
CCL5 (RANTES)	BA71dCD2_HI-Ro	Uninfected	5	5	0.0498	*
CCR2	BA71dCD2	Uninfected	5	5	0.532	ns
CCR2	BA71dCD2_Frac-Ro	Uninfected	5	5	0.0198	*
CCR2	BA71dCD2_HI-Ro	Uninfected	5	5	0.132	ns
CCR7	BA71dCD2	Uninfected	5	5	0.688	ns
CCR7	BA71dCD2_Frac-Ro	Uninfected	5	5	0.287	ns
CCR7	BA71dCD2_HI-Ro	Uninfected	5	5	0.00216	**
CD80	BA71dCD2	Uninfected	5	5	0.876	ns
CD80	BA71dCD2_Frac-Ro	Uninfected	5	5	0.862	ns
CD80	BA71dCD2_HI-Ro	Uninfected	5	5	0.0388	*
CXCL2	BA71dCD2	Uninfected	5	5	0.891	ns
CXCL2	BA71dCD2_Frac-Ro	Uninfected	5	5	0.0338	*
CXCL2	BA71dCD2_HI-Ro	Uninfected	5	5	0.12	ns
CXCL9	BA71dCD2	Uninfected	5	5	0.504	ns
CXCL9	BA71dCD2_Frac-Ro	Uninfected	5	5	0.309	ns
CXCL9	BA71dCD2_HI-Ro	Uninfected	5	5	0.0013	**
IFNA1	BA71dCD2	Uninfected	5	5	0.731	ns
IFNA1	BA71dCD2_Frac-Ro	Uninfected	5	5	0.118	ns
IFNA1	BA71dCD2_HI-Ro	Uninfected	5	5	3.35e-06	****
IFNB	BA71dCD2	Uninfected	5	5	0.224	ns
IFNB	BA71dCD2_Frac-Ro	Uninfected	5	5	0.59	ns
IFNB	BA71dCD2_HI-Ro	Uninfected	5	5	0.0475	*
IL12A	BA71dCD2	Uninfected	5	5	0.976	ns
IL12A	BA71dCD2_Frac-Ro	Uninfected	5	5	0.0722	ns
IL12A	BA71dCD2_HI-Ro	Uninfected	5	5	0.000714	***
IL12B	BA71dCD2	Uninfected	5	5	0.918	ns
IL12B	BA71dCD2_Frac-Ro	Uninfected	5	5	0.0549	ns
IL12B	BA71dCD2_HI-Ro	Uninfected	5	5	0.00376	**
IL18	BA71dCD2	Uninfected	5	5	0.726	ns
IL18	BA71dCD2_Frac-Ro	Uninfected	5	5	0.211	ns
IL18	BA71dCD2_HI-Ro	Uninfected	5	5	0.0135	*
IL1B	BA71dCD2	Uninfected	5	5	0.955	ns
IL1B	BA71dCD2_Frac-Ro	Uninfected	5	5	0.108	ns
IL1B	BA71dCD2_HI-Ro	Uninfected	5	5	9.28e-05	****
IL23	BA71dCD2	Uninfected	5	5	0.95	ns
IL23	BA71dCD2_Frac-Ro	Uninfected	5	5	0.625	ns
IL23	BA71dCD2_HI-Ro	Uninfected	5	5	9e-05	****
IL27	BA71dCD2	Uninfected	5	5	0.951	ns
IL27	BA71dCD2_Frac-Ro	Uninfected	5	5	0.0111	*
IL27	BA71dCD2_HI-Ro	Uninfected	5	5	0.00148	**
IL6	BA71dCD2	Uninfected	5	5	0.545	ns
IL6	BA71dCD2_Frac-Ro	Uninfected	5	5	0.027	*
IL6	BA71dCD2_HI-Ro	Uninfected	5	5	0.000269	***
IL8	BA71dCD2	Uninfected	5	5	0.98	ns
IL8	BA71dCD2_Frac-Ro	Uninfected	5	5	0.0814	ns
IL8	BA71dCD2_HI-Ro	Uninfected	5	5	4.15e-05	****
IRF7	BA71dCD2	Uninfected	5	5	0.823	ns
IRF7	BA71dCD2_Frac-Ro	Uninfected	5	5	0.355	ns
IRF7	BA71dCD2_HI-Ro	Uninfected	5	5	0.0158	*
ISG 15	BA71dCD2	Uninfected	5	5	0.69	ns
ISG 15	BA71dCD2_Frac-Ro	Uninfected	5	5	0.439	ns
ISG 15	BA71dCD2_HI-Ro	Uninfected	5	5	0.0024	**
MX1	BA71dCD2	Uninfected	5	5	0.324	ns
MX1	BA71dCD2_Frac-Ro	Uninfected	5	5	0.295	ns
MX1	BA71dCD2_HI-Ro	Uninfected	5	5	0.013	*
NFKB1	BA71dCD2	Uninfected	5	5	0.738	ns
NFKB1	BA71dCD2_Frac-Ro	Uninfected	5	5	0.566	ns
NFKB1	BA71dCD2_HI-Ro	Uninfected	5	5	0.0326	*
NFKB2	BA71dCD2	Uninfected	5	5	0.549	ns
NFKB2	BA71dCD2_Frac-Ro	Uninfected	5	5	0.65	ns
NFKB2	BA71dCD2_HI-Ro	Uninfected	5	5	0.0319	*
NLRP3	BA71dCD2	Uninfected	5	5	0.2	ns
NLRP3	BA71dCD2_Frac-Ro	Uninfected	5	5	0.203	ns
NLRP3	BA71dCD2_HI-Ro	Uninfected	5	5	0.0973	ns
SLA-DRB	BA71dCD2	Uninfected	5	5	0.994	ns
SLA-DRB	BA71dCD2_Frac-Ro	Uninfected	5	5	0.744	ns
SLA-DRB	BA71dCD2_HI-Ro	Uninfected	5	5	0.602	ns
SLA-DRB1	BA71dCD2	Uninfected	5	5	0.973	ns
SLA-DRB1	BA71dCD2_Frac-Ro	Uninfected	5	5	0.864	ns
SLA-DRB1	BA71dCD2_HI-Ro	Uninfected	5	5	0.472	ns
TNFA	BA71dCD2	Uninfected	5	5	0.911	ns
TNFA	BA71dCD2_Frac-Ro	Uninfected	5	5	0.00949	**
TNFA	BA71dCD2_HI-Ro	Uninfected	5	5	0.000273	***
TLR1	BA71dCD2	Uninfected	5	5	0.292	ns
TLR1	BA71dCD2_Frac-Ro	Uninfected	5	5	0.553	ns
TLR1	BA71dCD2_HI-Ro	Uninfected	5	5	0.481	ns
