# Supplementary material for: Adjuvant-induced macrophage activation compromises BA71ΔCD2-mediated protection against African swine fever virus
Source: Research Square preprint supplement (doi:10.21203/rs.3.rs-7815447/v1), 2025-11-06
Supplement: Supplementary file 3 [file d600a7edcf26c0b698001add.xlsx]

## Sheet: Hoja1
Supplementary data 2. Sequence of primers used for microfluidic qPCR assays.
Gene	Ensamble code	Forward primer	Reverse primer	R2	% Efficiency
IL-1B	ENSSSCG00000039214	TCTCTCACCCCTTCTCCTCA	GACCCTAGTGTGCCATGGTT	88	0,997
IL-6	ENSSSCG00000020970	CCTCTCCGGACAAAACTGAA	TCTGCCAGTACCTCCTTGCT	72	0,978
IL-12A	ENSSSCG00000011730	CCACCTGGACCATCTCAGTT	CAGCAGATTTTGGGAGTGGT	94	0,965
IL-12B	ENSSSCG00000017044	GACCAGAAAGAGCCCAAAAAC	AGGTGAAACGTCCGGAGTAA	78	0,991
IL-18	ENSSSCG00000015037	CTGCTGAACCGGAAGACAAT	TCCGATTCCAGGTCTTCATC	80	0,997
IL-23	ENSSSCG00000033520	CAACAGTCAGTCCTGCTTGC	GCTCCCCTGTGAAAATGTCT	87	0,995
IL-27	ENSSSCG00000039300	TCTGAGGCTGAATCACACCTGC	GAGTCGTTCTGGGTCAGAGAGG	87	0,995
TNF	ENSSSCG00000060860	ACTGCACTTCGAGGTTATCGG	TGAGACGATGATCTGAGTCCT	86	0,988
NLRP3	ENSSSCG00000013940	GACTTTCCAGGAGTTCTTTGCTG	CCTGGTTTACAAGGCCAAAG	86	0,99
CCL2	ENSSSCG00000017723	ACCAGCAGCAAGTGTCCTAAA	GTCCAGGTGGCTTATGGAGT	87	0,996
CCL3	ENSSSCG00115008383	CTCTGCAGCCAGGTCTTCTC	CTACGAATTTGCGAGGAAGC	87	0,993
CCL4	ENSSSCG00000032343	TCCTCGCAACTTCGTGACTG	CCTTTTTGGTCTGGAATACCACGG	85	0,998
CCL5 (RANTES)	ENSSSCG00000017705	CTCCATGGCAGCAGTCGT	AAGGCTTCCTCCATCCTAGC	89	0,996
IL-8	ENSSSCG00000008953	TTGCCAGAGAAATCACAGGA	TGCATGGGACACTGGAAATA	101	0,988
CXCL2	ENSSSCG00000008959	GGATAGCACGCTGTACCATC	ACTGTCTCAATAAATAACAACCGAC	88	0,997
CXCL9	ENSSSCG00000032777	TGATTGGAGTTCAAGGAACCCT	TCTCACAAGAAGGGCTTGGG	81	0,986
CCR2	ENSSSCG00000024311	AAGAAGCAACAGACCGGGCA	CTTCGATTTGTCCCACGCTG	60	0,985
NFKB1	ENSSSCG00000030957	TCCACAAGGCAGCAAATAGA	AAGCTGAGTTTGCGAAAGGA	86	0,995
NFKB2	ENSSSCG00000010580	GAACAGCCTAAGCAGCGAGG	GCCCTTCTCACTAGAGGCAC	83	0,989
IFNA1	ENSSSCG00000052950	TTCCAGCTCTTCAGCACAGA	AGCTGCTGATCCAGTCCAGT	88	0,978
IRF7	ENSSSCG00000012853	GGCACCTTCTTCCAAGAGTTGAT	GAAGCCCAGGTAGATGGTGTAG	87	0,994
MX1	ENSSSCG00000012077	AGACAGGACCATCGGGATCTT	TTCTCGCCACGTCCACTATC	88	0,996
ISG15	ENSSSCG00000040575	GGACCTGAAGCAGCAGATCG	CACCCCATCCTGAAGCACAT	90	0,995
CD80	ENSSSCG00000011899	CGCACCTTCACTGATGTCAC	CACAGGTGTAGGTGCCATTG	80	0,981
CCR7	ENSSSCG00000017466	GGTCCAACCAACTCTCGGAAT	TTGCTGGCTCGGATGACA	86	0,989
SLA-DRB1	ENSSSCG00000001455	TGACGGTGTATCCTGCAAAG	GTAGAACCCGGTCACAGAGC	77	0,993
TLR1	ENSSSCG00000026583	CCTTCAAGACCTTAACACACAGAG	CAGATTTACTGCGGTGCTGA	78	0,998
IFNB	ENSSSCG00000005163	CACTGGCTGGAATGAAACCG	AATGGTCATGTCTCCCCTGG	61	0,996
CASP8	ENSSSCG00000028157	CCGAAACTTGGACCATAATGA	GATGATGCCCTTGTCTCCAT	89	0,995
BCL2	ENSSSCG00000062696	CCCTGTGGATGACTGAGTACC	AACCACACATGCACCTACCC	100	0,983
ACTB	ENSSSCG00000007585	CTACGTCGCCCTGGACTTC	GCAGCTCGTAGCTCTTCTCC	94	0,999
YWHAZ	ENSSSCG00000006062	ATTGGGTCTGGCCCTTAACT	GCGTGCTGTCTTTGTATGACTC	89	0,966
RPL4	ENSSSCG00000004945	AGGAGGCTGTTCTGCTTCTG	TCCAGGGATGTTTCTGAAGG	90	0,997
GAPDH	ENSSSCG00000000694	GTGCATTGCCAGCCGCGT	ACTGGAACATGTAGACCATGTAGT	86	0,997
